# Supplementary material for: Transcription factor-based transdifferentiation of human embryonic to trophoblast stem cells
Source: PubMed Central journal article supplement (PMC11556314; doi:10.1242/dev.202778), 2024-09-10
Supplement: develop-151-202778-s1.pdf [file develop-151-202778-s1.pdf]

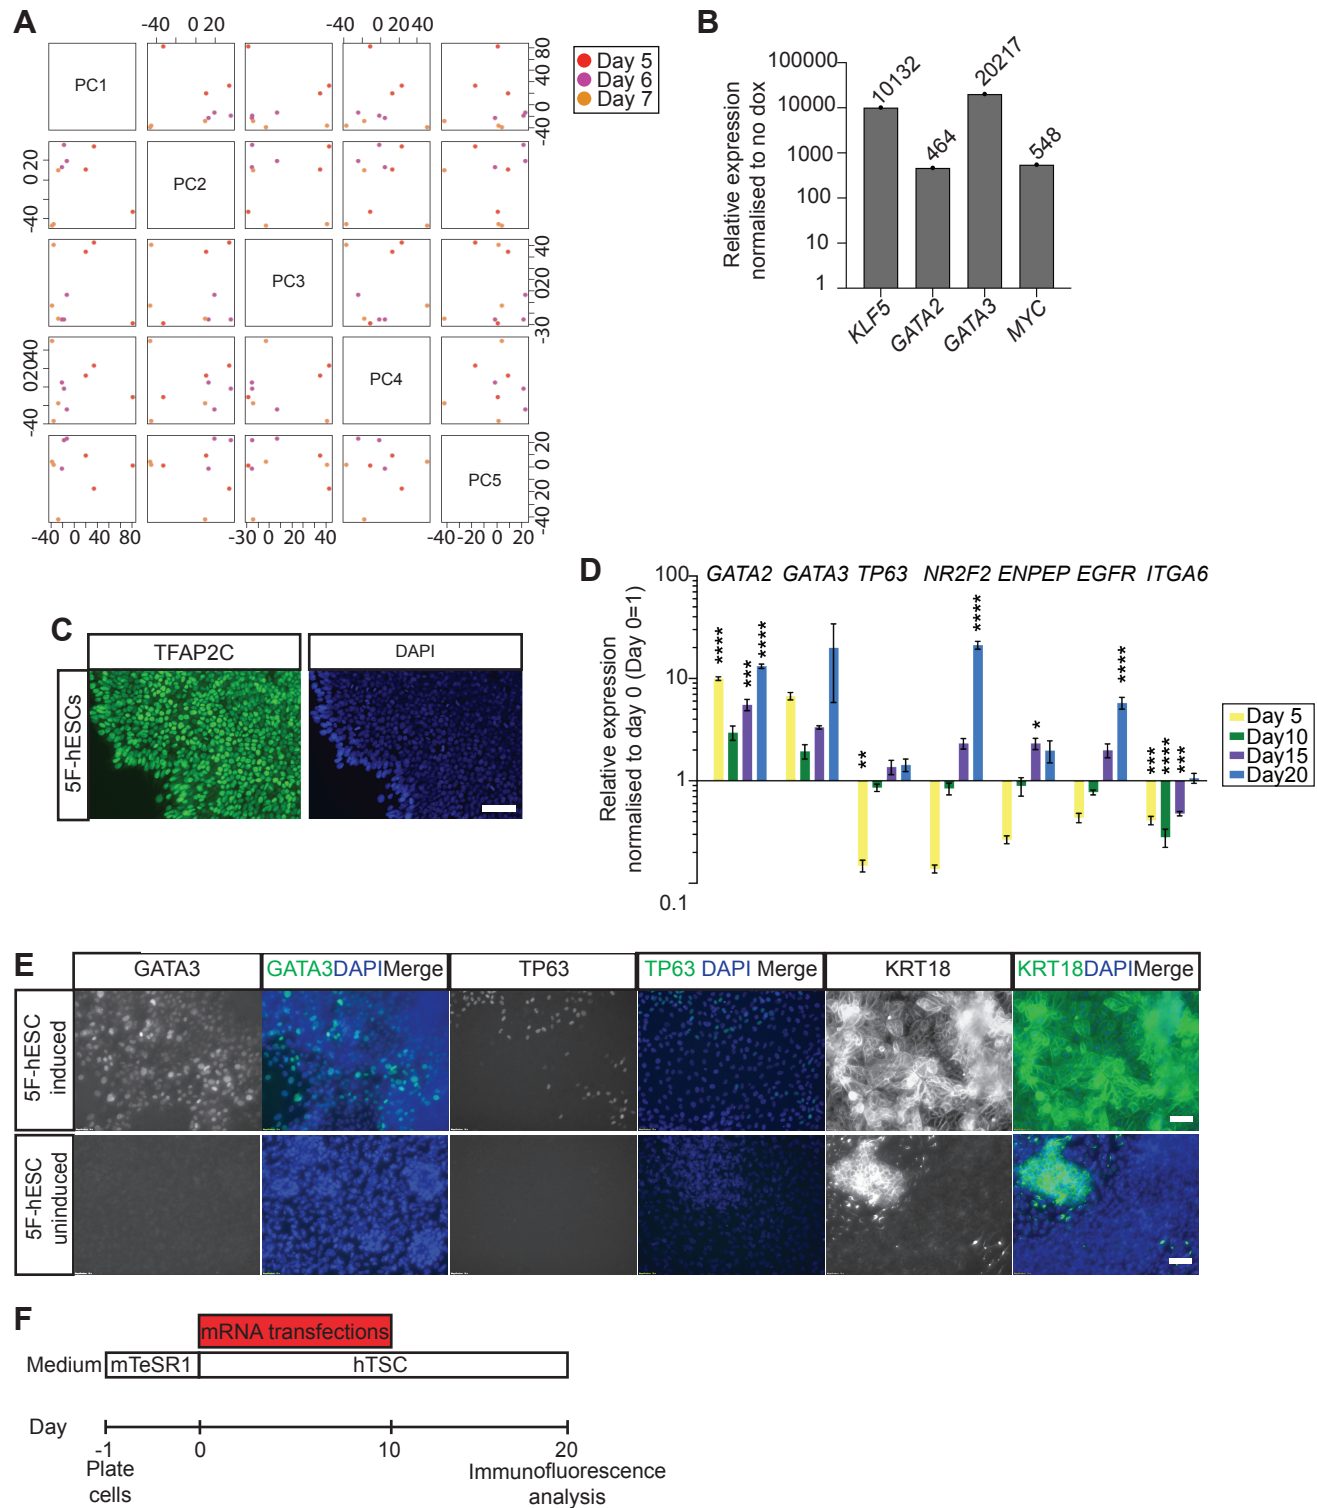

**Fig. S1.** Principal component analysis matrix using the first five principal components for the top 12,000 most variable expressed genes in day 5, 6 and 7 TE samples. (B) RT-qPCR analysis for the detection of exogenous *KLF5*, *GATA2*, *GATA3* and *MYC* in 5F-hESCs after 48 h of doxycycline treatment. Relative expression is reflected as fold change over uninduced 5F-hESCs cultured normalized to *GAPDH*. (C) Immunofluorescence analysis for the detection of TFAP2C in 5F-hESCs after 48 h of doxycycline. (D) Time-course qRT-PCR analysis for the detection of endogenous *GATA2*, *GATA3*, *TP63*, *NR2F2*, *ENPEP*, *EGFR* and *ITGA6* in 5F-hESCs across 20 days of dox-induction in hTSC media. Relative expression is reflected as fold change over 5F-hESCs at day 0 plated in mTSeR pluripotency media, normalized to *GAPDH*. (E) Immunofluorescence analysis for the detection of GATA3, TP63 and KRT18 (green) and DAPI nuclear expression (blue) in doxycycline-induced and uninduced 5F-hESCs on day 20. Scale bars: 50  $\mu$ m. (F) Schematic representation of the strategy for combinatorial transdifferentiation experiments using modified mRNAs.

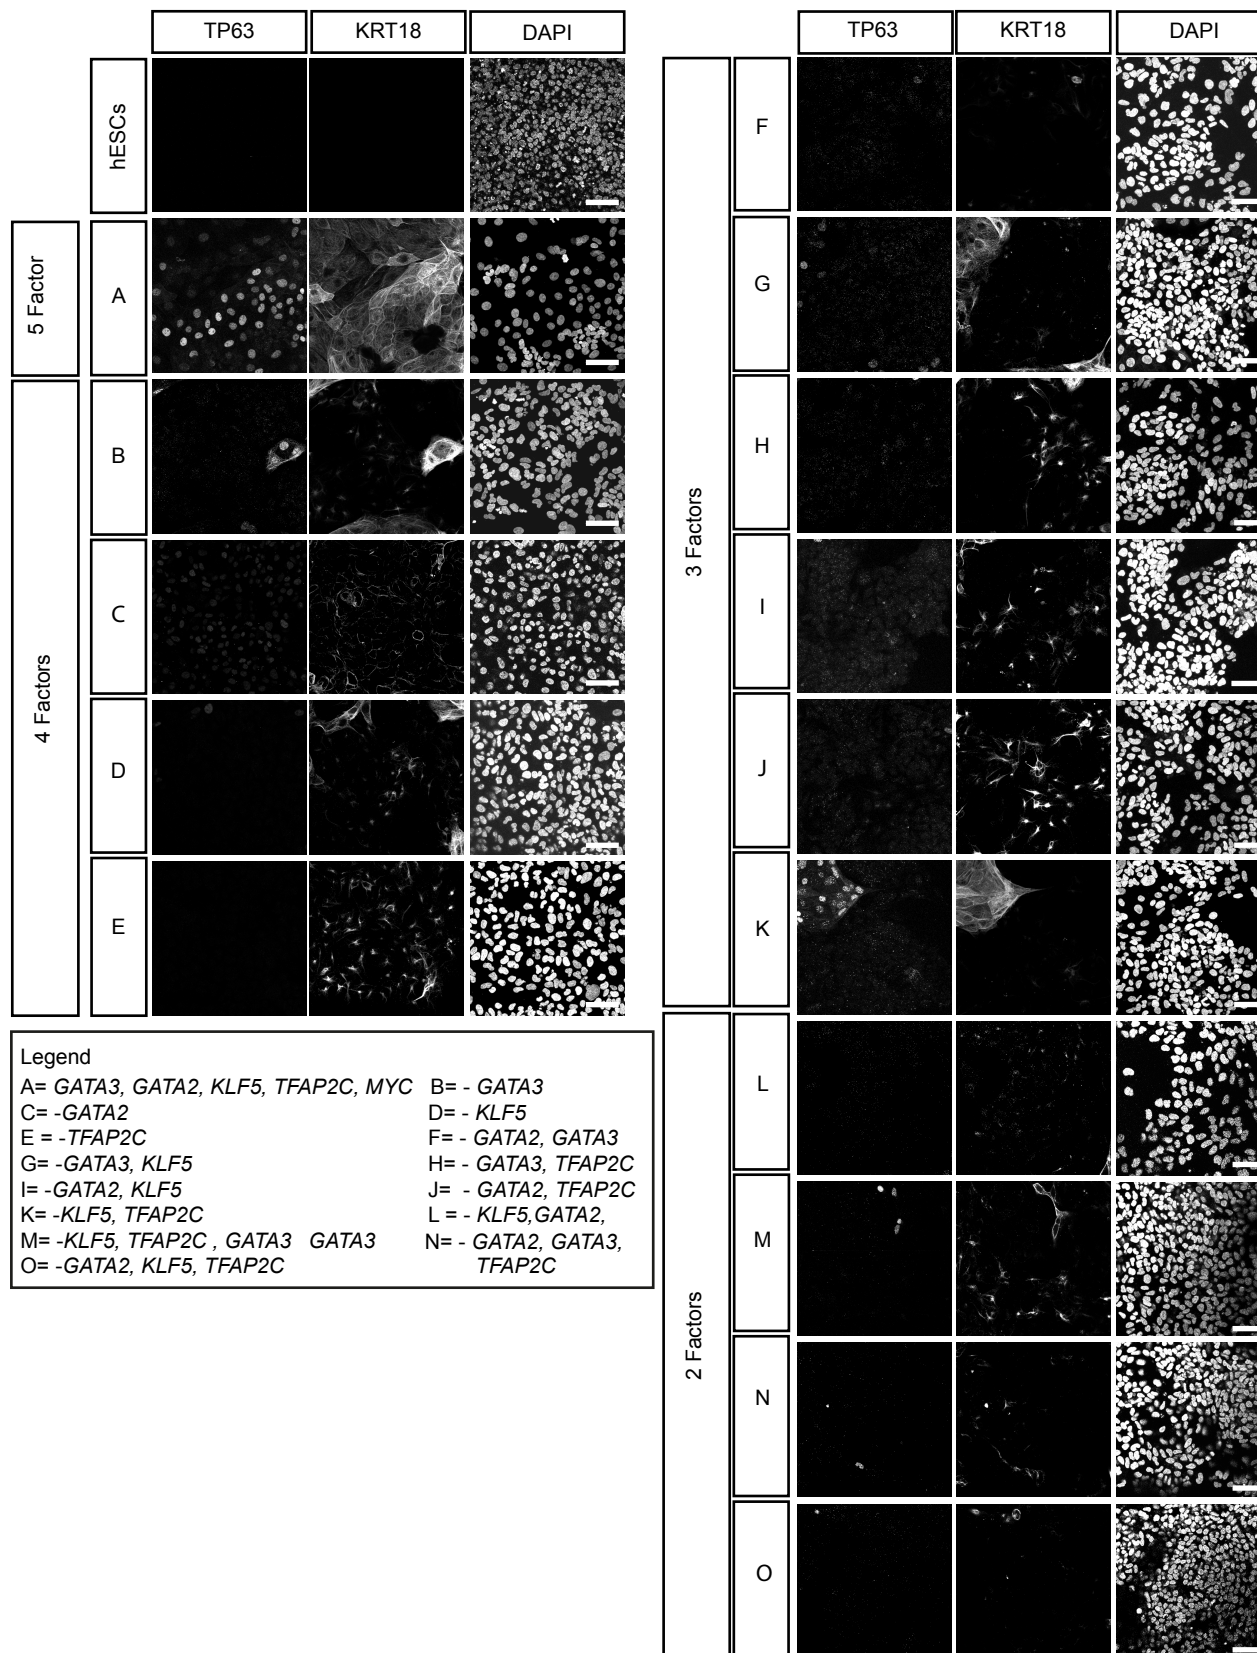

**Fig. S2.** Extended immunofluorescence analysis for the detection of TP63, KRT18 and DAPI nuclear expression in transfected cells. Key for mRNA cocktail combinations: A, Five factors positive controls; B, *GATA2, TFAP2C, KLF5* and *MYC* (*GATA3* omitted); C, *GATA3, TFAP2C, KLF5* and *MYC* (*GATA2* omitted); D, *GATA2, GATA3, TFAP2C* and *MYC* (*KLF5* omitted); E, *GATA2, GATA3, KLF5* and *MYC* (*TFAP2C* omitted); F, *TFAP2C, KLF5* and *MYC* (*GATA2* and *GATA3* omitted); G, *GATA2, TFAP2C* and *MYC* (*GATA3* and *KLF5* omitted); H, *GATA2, KLF5* and *MYC* (*GATA3* and *TFAP2C* omitted); I, *GATA3, TFAP2C* and *MYC* (*GATA2* and *KLF5* omitted); J, *GATA3, KLF5* and *MYC* (*GATA2* and *TFAP2C* omitted); K, *GATA2, GATA3* and *MYC* (*TFAP2C* and *KLF5* omitted); L, *TFAP2C, KLF5* and *MYC* (*KLF5, GATA2* and *GATA3* omitted); M, *GATA2* and *MYC* (*GATA3, TFAP2C* and *KLF5*); N, *KLF5* and *MYC* (*GATA2, GATA3* and *TFAP2C* omitted). hESCs cultured in mTeSR1 media are included as a negative control. Scale bars: 50  $\mu$ m.



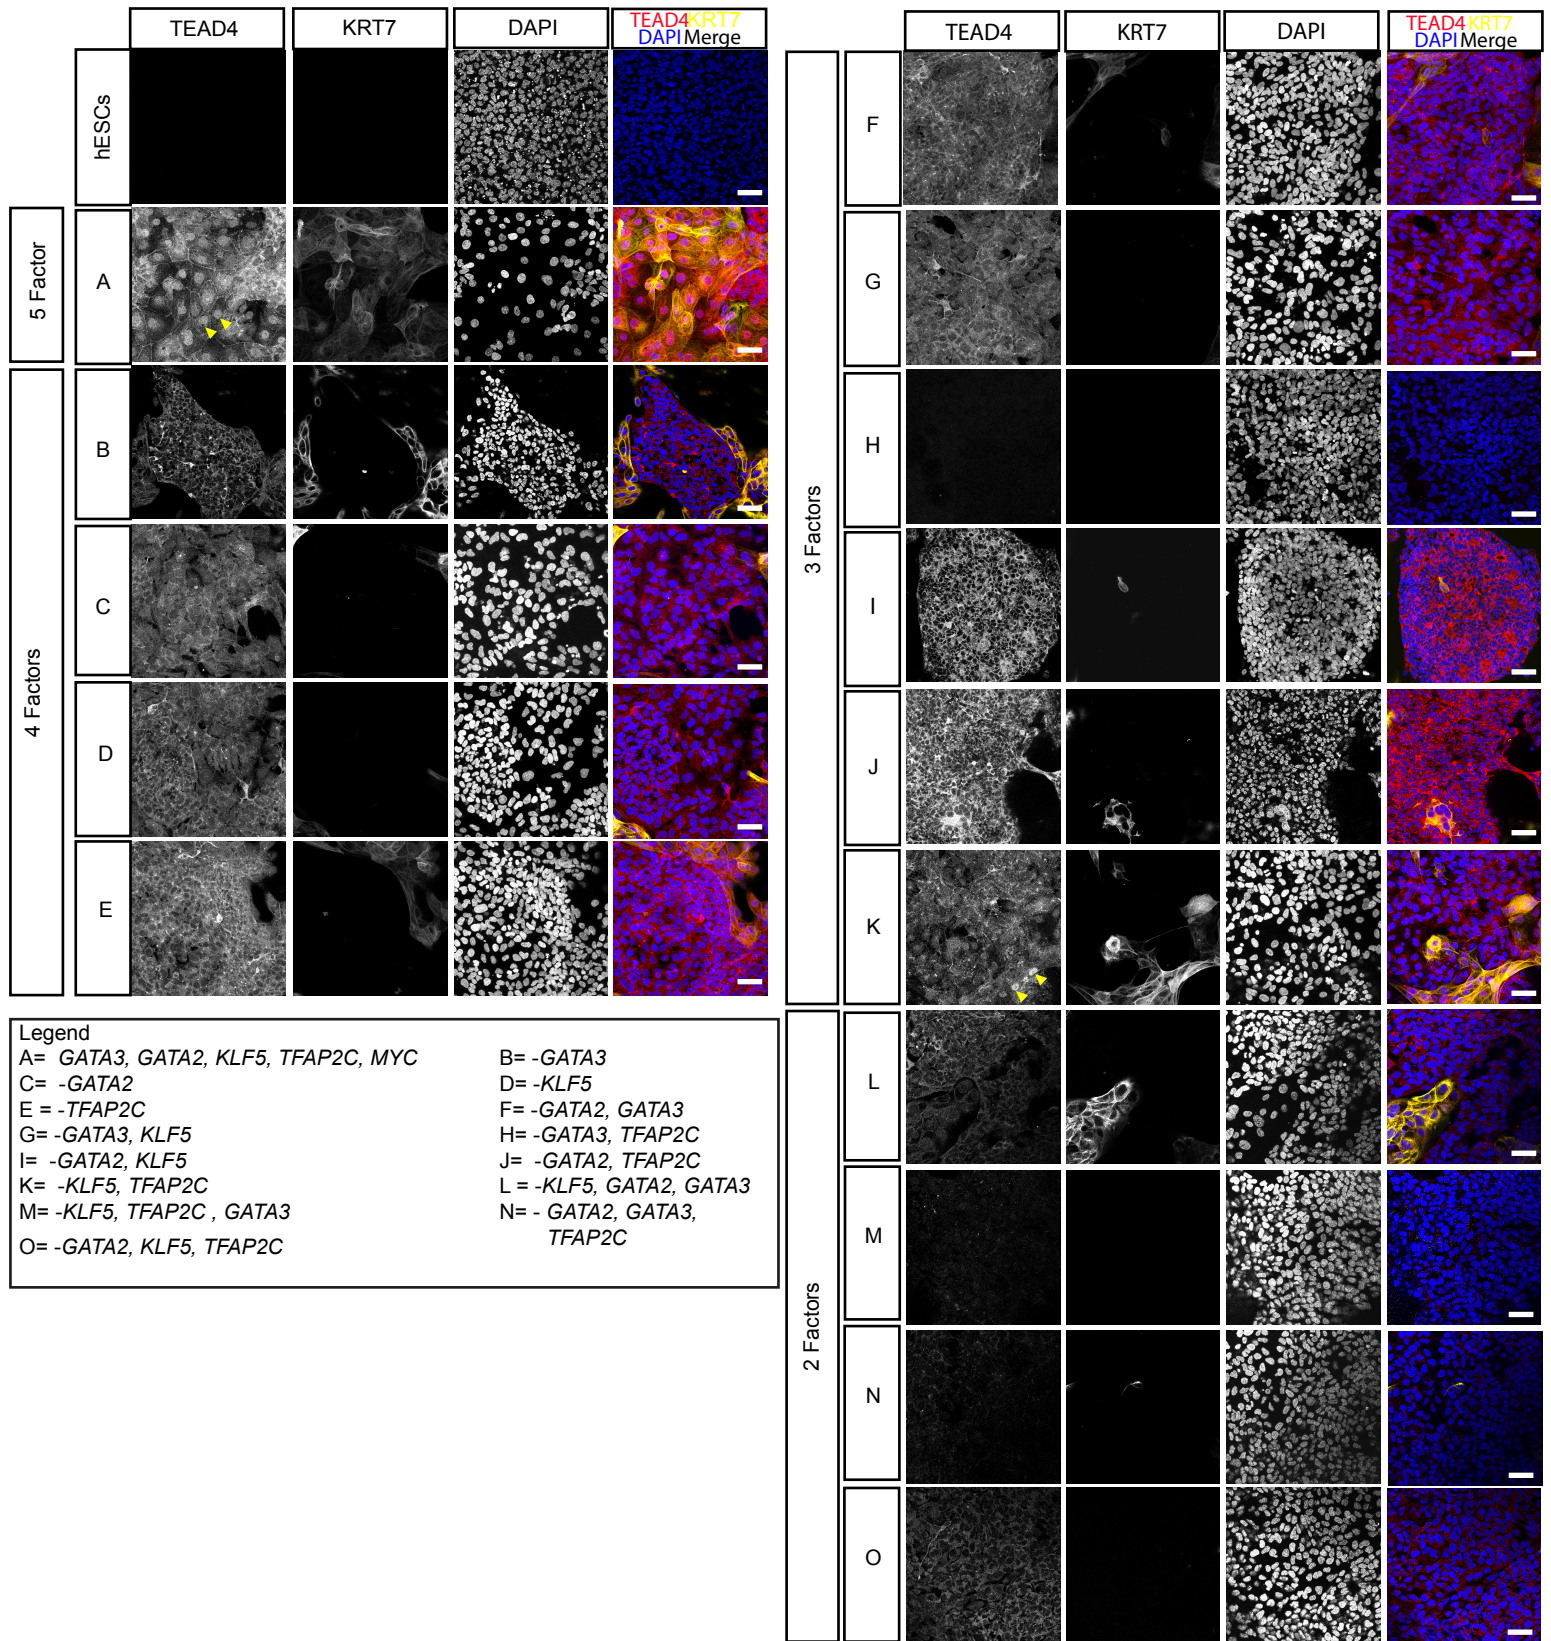

**Fig. S3.** Immunofluorescence analysis for the detection of TEAD4 (red), KRT7 (yellow) and DAPI (blue) nuclear expression in transfected cells. Key for mRNA cocktail combinations: A, Five factors positive controls; B, *GATA2*, *TFAP2C*, *KLF5* and *MYC* (*GATA3* omitted); C, *GATA3*, *TFAP2C*, *KLF5* and *MYC* (*GATA2* omitted); D, *GATA2*, *GATA3*, *TFAP2C* and *MYC* (*KLF5* omitted); E, *GATA2*, *GATA3*, *KLF5* and *MYC* (*TFAP2C* omitted); F, *TFAP2C*, *KLF5* and *MYC* (*GATA2* and *GATA3* omitted); G, *GATA2*, *TFAP2C* and *MYC* (*GATA3* and *KLF5* omitted); H, *GATA2*, *KLF5* and *MYC* (*GATA3* and *TFAP2C* omitted); I, *GATA3*, *TFAP2C* and *MYC* (*GATA2* and *KLF5* omitted); J, *GATA3*, *KLF5* and *MYC* (*GATA2* and *TFAP2C* omitted); K, *GATA2*, *GATA3* and *MYC* (*TFAP2C* and *KLF5* omitted); L, *TFAP2C*, *KLF5* and *MYC* (*KLF5*, *GATA2* and *GATA3* omitted); M, *GATA2* and *MYC* (*GATA3*, *TFAP2C* and *KLF5*); N, *KLF5* and *MYC* (*GATA2*, *GATA3* and *TFAP2C* omitted). hESCs cultured in in mTeSR1 media are included as a negative control.

**Table S1.** Bulk RNA-sequencing analysis of TE across human embryo development. RNA-seq data is normalised using the RPKM method.

Available for download at

<https://journals.biologists.com/dev/article-lookup/doi/10.1242/dev.202778#supplementary-data>

**Table S2. Genes expressed in common or unique to a specific stage of TE development.** Genes were considered to be expressed if RPKM>5.

Available for download at

<https://journals.biologists.com/dev/article-lookup/doi/10.1242/dev.202778#supplementary-data>

**Table S3. Transcription factors detected in human TE by RNA-seq analysis.**

Available for download at

<https://journals.biologists.com/dev/article-lookup/doi/10.1242/dev.202778#supplementary-data>



**Table S4. DESeq2 analysis was used to calculate the probability of differential expression between human TE and EPI. RPKM values and log<sub>2</sub>-fold change difference in expression are noted.**

| <b>DESeq2 analysis</b> |                |                 |                          |                |
|------------------------|----------------|-----------------|--------------------------|----------------|
|                        | <b>TE mean</b> | <b>EPI mean</b> | <b>Log<sub>2</sub>FC</b> | <b>p-value</b> |
| GATA2                  | 4528.6         | 16.1            | 8.1                      | 2.20E-19       |
| GATA3                  | 8457.3         | 255.1           | 5                        | 4.06E-13       |
| KLF5                   | 4609.4         | 1931.3          | 2.4                      | 0.08           |
| TFAP2C                 | 1525.7         | 1135.1          | 0.4                      | 0.9            |
| MYC                    | 3830.4         | 1405.5          | 1.4                      | 0.6            |

**RPKM values at time-points analysed**

|        | <b>Day 5</b> | <b>Day 6</b> | <b>Day 7</b> |
|--------|--------------|--------------|--------------|
| GATA2  | 19.3         | 65.6         | 52.5         |
| GATA3  | 93.8         | 120.4        | 96.8         |
| KLF5   | 45.2         | 45.2         | 46.7         |
| TFAP2C | 644.2        | 98.8         | 393.7        |
| MYC    | 32.9         | 50.9         | 39.5         |

**Table S5. Oligonucleotide sequences used for qRT-PCR analysis.**

| <u>Oligo ID</u> | <u>Sequence</u>         | <u>Reference</u>       | <u>Oligo ID</u> | <u>Sequence</u>      |
|-----------------|-------------------------|------------------------|-----------------|----------------------|
| GAPDH_F         | GATGACATCAAGAAGGTGGTG   |                        | GATA3_3UTR_F    | GGTGTCTGTGTTCCAACCAC |
| GAPDH_R         | GTCTACATGGCAACTGTGAGG   |                        | GATA3_3UTR_R    | GTGGCCAGTGAAAGGAAACA |
| TP63_F          | CTGGAAAACAATGCCCAGA     | Soncin et al. 2018     | GATA3_F         | CCGCCCTACTACGGAAACTC |
| TP63_R          | AGAGAGCATCGAAGGTGGAG    | Soncin et al. 2018     | GATA3_R         | TCTTGAGAAGGGGCTGAGA  |
| EGFR_F          | CTAAGATCCCGTCCATCGCC    | Soncin et al. 2018     | GATA2_3UTR_F    | AGGCCACTGACCATGAAGAA |
| EGFR_R          | GGAGCCCAGCACTTTGATCT    | Soncin et al. 2018     | GATA2_3UTR_R    | CGACGTCCATCTGTTCCCTA |
| ITGA6_F         | GGCGGTGTTATGTCTGAGTC    |                        | GATA2_F         | GACTACAGCAGCGGACTCTT |
| ITGA6_R         | AATCGCCCATCACAAAAGCTC   |                        | GATA2_R         | GTTGTCGTCTGACAATTTGC |
| ENPEP_F         | AATTTATGTCCAGCCAGAGC    |                        |                 |                      |
| ENPEP_R         | GTGATGAGTCCCCAGTTCTC    |                        |                 |                      |
| NR2F2_F         | GCCATAGTCTGTTCACCTCA    | lo et al. 2021         |                 |                      |
| NR2F2_R         | AATCTCGTCGGCTGGTTG      | lo et al. 2021         |                 |                      |
| ENDOU_F         | ACAGGGCAGACACCAACAAA    |                        |                 |                      |
| ENDOU_R         | AGGAGGTTGATGAAGCTGC     |                        |                 |                      |
| GCM1_F          | TGCTGTCTGCTTCTCCGTAA    |                        |                 |                      |
| GCM1_R          | CACCTATTCGACTCCCCCTCA   |                        |                 |                      |
| PSG3_F          | TCGTAAAGCGAGGTGATGGG    | lo et al. 2021         |                 |                      |
| PSG3_R          | AAGCTCACAGCCTCCATGTC    | lo et al. 2021         |                 |                      |
| SDC1_F          | CTTCACACTCCCCACACAGA    | lo et al. 2021         |                 |                      |
| SDC1_R          | GTATTCTCCCCGAGGTTTC     | lo et al. 2021         |                 |                      |
| HLAG_F          | CCACCACCCTGTCTTTGACTAT  | lo et al. 2021         |                 |                      |
| HLAG_R          | ACGTCCTGGGTCTGGTCTT     | lo et al. 2021         |                 |                      |
| LRR32_F         | GCTGCACAACACCAAGACAAA   | lo et al. 2021         |                 |                      |
| LRR32_R         | GATCAAGGGTCTCAGTGTCTGG  | lo et al. 2021         |                 |                      |
| LVRN_F          | GGGAGGGACTCTTCTCAAC     | lo et al. 2021         |                 |                      |
| LVRN_R          | GGGAAAACATACCTGGCAAA    | lo et al. 2021         |                 |                      |
| MMP2_F          | CCCTGTGTCTTCCCCTTAC     |                        |                 |                      |
| MMP2_R          | ATCGTAGTTGGCTGTGGTCTG   |                        |                 |                      |
| NOTUM_F         | TTTGCTACAAGGTCTACCCG    | lo et al. 2021         |                 |                      |
| NOTUM_R         | TCAAACAGCCACTGCACCAC    | lo et al. 2021         |                 |                      |
| GABRP_F         | GCCCTAACAGAGCCTCAACA    | Rostovkaya et al. 2022 |                 |                      |
| GABRP_R         | CCCTGGATGCACATCCTCTC    | Rostovkaya et al. 2022 |                 |                      |
| HEY1_F          | GCTGGTACCCAGTGCTTTGAG   | lo et al. 2021         |                 |                      |
| HEY1_R          | CAAGGGCGTGCGGTCAAAGTA   | lo et al. 2021         |                 |                      |
| ISL1_F          | TCTCCGGATTTGGAATGGCA    | Yang et al. 2021       |                 |                      |
| ISL1_R          | CCTTGCACCGCTTGTGTTGA    | Yang et al. 2021       |                 |                      |
| WNT6_F          | CAGCCCCTGGTTATGGACC     |                        |                 |                      |
| WNT6_R          | TCTCCGAATGCCTGTTGC      |                        |                 |                      |
| MYC_3UTR_F      | ACCCTTCGCTATCATGCCTT    |                        |                 |                      |
| MYC_3UTR_R      | TCTTGGGCATGTGGATGAGT    |                        |                 |                      |
| MYC_F           | CGTCCTCGGATTCTCTGCTC    |                        |                 |                      |
| MYC_R           | GCTGCGTAGTTGTGCTGATG    |                        |                 |                      |
| KLF5_3UTR_F     | GGGCTCCCTCAAATGACAGA    |                        |                 |                      |
| KLF5_3UTR_R     | CCACCCCTTACCCATGTTGA    |                        |                 |                      |
| KLF5_F          | CCACCACCTGCCAGTTAAC     | Takeda et al. 2022     |                 |                      |
| KLF5_R          | TAAACTTTGTGCAACCAGGGTAA | Takeda et al. 2022     |                 |                      |



**Table S6. Antibodies used for immunofluorescence analysis.**

| <b>Antibody</b>               | <b>Species</b> | <b>Supplier</b> | <b>Catalogue Number</b> |
|-------------------------------|----------------|-----------------|-------------------------|
| OCT4                          | Mouse IgG2b    | Santa Cruz      | SC-5279                 |
| NANOG                         | Goat           | R&D             | AF1997                  |
| GATA3                         | Goat           | R&D             | AF2605                  |
| TFAP2C                        | Goat           | R&D             | AF5059                  |
| GATA2                         | Rabbit         | Santa Cruz      | SC-9008                 |
| NANOG                         | Rabbit         | Abcam           | ab21624                 |
| KLF5                          | Rabbit         | Abcam           | ab137676                |
| CYTOKERATIN18                 | Mouse IgG1     | Abcam           | ab668                   |
| TP63                          | Mouse          | Biocare         | 3066                    |
| GCM1                          | Rabbit         | Sigma           | HPA011343               |
| HAND1                         | Rabbit         | Abcam           | ab196622                |
| TBX3                          | Goat           | Santa Cruz      | SC-17871                |
| SOX2                          | Rat            | eBioscience     | 14-9811-82              |
| TEAD4                         | Mouse IgG2a    | Abcam           | ab58310                 |
| CYTOKERATIN7                  | Mouse          | Agilent Dako    | GA61961-2               |
| Alexa Fluor<br>488 Phalloidin |                | ThermoFischer   | A12381                  |

**Table S7. Annotated sequence files of constructs used to generate modified mRNAs. T7 promoters and T7 terminators are in bold font and underlined. 5'UTR and 3'UTR sequences are in bold font.**

GATA2 isoform 1

**TAATACGACTCACTATAG**GGAAATAAGAGAGAAAAGAAGAGTAAGAAGAAATATAAGAGCCACCATGGAGGTGGC  
GCCCGAGCAGCCGCGCTGGATGGCGCACCCGGCCGTGCTGAATGCGCAGCACCCCGACTCACACCACCCGGGCCCT  
GGCGCACAACTACATGGAACCCGCGCAGCTGCTGCCTCCAGACGAGGTGGACGCTCTTCTTCAATCACCTCGACTC  
GCAGGGCAACCCCTACTATGCCAACCCCGCTCACGCGCGGGCGCGCTCTCTACAGCCCCGCGCACGCCCGCCT  
GACCGGAGGCCAGATGTGCCGCCACACTTGTTCACAGCCCGGTTTGGCCTGGCTGGACGGGGGCAAAGCAGC  
CCTCTCTGCCGCTGCGGCCACCACCACAACCCCTGGACCGTGAGCCCTTCTCCAAGACGCCACTGCACCCCTC  
AGCTGCTGGAGGCCCTGGAGGCCACTCTCTGTGTACCCAGGGGCTGGGGGTGGGAGCGGGGGAGGCAGCGGGAG  
CTCAGTGGCCTCCCTCACCCCTACAGCAGCCCACTCTGGCTCCACCTTTTCGGCTTCCCACCCAGCCACCCAA  
AGAAGTGTCTCCTGACCCTAGCACACCAGGGGGCTGCGTCTCCAGCCTCATCTTCCGCGGGGGTAGTGCAGCCCG  
AGGAGAGGACAAGGACGGCGTCAAGTACCAGGTGTCACTGACGGAGAGCATGAAGATGGAAAGTGGCAGTCCCTT  
GCGCCAGGCCTAGCTACTATGGGCACCCAGCCTGCTACACACCACCCCATCCCCACCTACCCCTCCTATGTGCC  
GGCGGCTGCCACGACTACAGCAGCGGACTCTTCCACCCCGGAGGCTTCTGGGGGGACCGGCCCTCCAGCTTCAC  
CCCTAAGCAGCGCAGCAAGGCTCGTTCCTGTTTCAAGAGCCGGAGTGTGTCAACTGTGGGGCCACAGCCACCC  
TCTCTGGCGGGGACGGCACCCGGCCACTACCTGTGCAATGCCTGTGGCCTTACCACAAGATGAATGGGCAGAA  
CCGACCACTCATCAAGCCCAAGCGAAGACTGTGCGCCGCCAGAAGAGCCGGCACCTGTTGTGCAAAATGTGACAG  
GACAACCACCACCTTATGGCGCCGAAACGCCAACGGGGACCCCTGTCTGCAACGCCTGTGGCCTTACTACAAGCT  
GCACAATGTTAACAGGCCACTGACCATGAAGAAGGAAGGGATCCAGACTCGGAACCGGAAGATGTCCAACAAGTC  
CAAGAAGAGCAAGAAAGGGGCGGAGTGCTTCGAGGAGCTGTCAAAGTGCATGCAGGAGAAGTCATCCCCCTTCAG  
TGCAGCTGCCCTGGCTGGACACATGGCACCTGTGGGCCACCTCCCGCCCTTCAGCCACTCCGGACACATCCTGCC  
CACTCCGACGCCCATCCACCCCTCCTCCAGCCTCTCCTTCGGCCACCCCAACCCGTCAGCATGGTGACCGCCAT  
GGGCTAG**GCTGCCTTCTGCGGGGCTTGCCCTTCTGGCCATGCCCTTCTTCTTCCCTTGACCTGTACCTCTTGGT**  
**CTTTGAATAAAGCCTGAGTAGGAAGTAGCATAACCCCTTGGGGCTCTAAACGGGTCTTGAGGGGTTTTTTG**

GATA3 isoform 1

**TAATACGACTCACTATAG**GGAAATAAGAGAGAAAAGAAGAGTAAGAAGAAATATAAGAGCCACCATGGAGGTGAC  
GGCGGACCAGCCGCGCTGGGTGAGCCACCACCACCCCGCCGTGCTCAACGGGCAGCACCCGGACACGCACCACCC  
GGGCCTCAGCCACTCCTACATGGACGCGGCGCAGTACCCGCTGCCGGAGGAGGTGGATGTGCTTTTTTAACATCGA  
CGGTCAAGGCAACCACGTCCC GCCCTACTACGAAACTCGGTGAGGGCCACGGTGCAGAGGTACCCCTCCGACCCA  
CCACGGGAGCCAGGTGTGCCGCCCGCCTCTGCTTCATGGATCCCTACCCCTGGCTGGACGGCGGCAAAGCCCTGGG  
CAGCCACCACACCCGCTCCCCCTGGAATCTCAGCCCTTCTCCAAGACGTCCATCCACCACGGCTCCCCGGGGCC  
CCTCTCCGTCTACCCCGGCCCTCGTCTCCTCCTGTGCGGGGGCCACGCCAGCCCGCACCTCTTACCTTCCC  
GCCCACCCCGCCGAAGGACGTCTCCCCGACCCATCGCTGTCCACCCAGGCTCGGCCGGCTCGGCCGGCAGGA  
CGAGAAAGAGTGCCTCAAGTACCAGGTGCCCTGCCCCGACAGCATGAAGCTGGAGTCTGCCACTCCCCTGGCAG  
CATGACCGCCCTGGGTGGAGCCTCCTCGTTCGACCCACCACCCCATCACCACTACCCGCCCTACGTGCCCGAGTA  
CAGCTCCGGACTCTTCCCCCCAGCAGCCTGCTGGGGCGGCTCCCCACCGGCTTCGGATGCAAGTCCAGGCCCAA  
GGCCCGGTCCAGCACAGAAGGCAGGGAGTGTGTGAACTGTGGGGCAACCTCGACCCCACTGTGGCGGCGAGATGG  
CACGGGACACTACCTGTGCAACGCCTGCGGGCTCTATCACAAAATGAACGGACAGAACC GGCCCTCATTAAGCC  
CAAGCGAAGGCTGTCTGCAGCCAGGAGAGCAGGGACGTCTGTGCGAAGTGTGACACCACCAACCACACTCTG  
GAGGAGGAATGCCAATGGGGACCCTGTCTGCAATGCCTGTGGGCTTACTACAAGCTTACAATATTAACAGACC  
CCTGACTATGAAGAAGGAAGGCATCCAGACCAGAAACCGAAAAATGTCTAGCAAATCCAAAAAGTGCAAAAAAGT  
GCTGACTCACTGGAGGACTTCCCCAAGAACAGCTCGTTTAAACCGGCCCTTCCAGACACATGTCCCTCCCT  
GAGCCACATCTCGCCCTCAGCCACTCCAGCCACATGCTGACCACGCCACGCCGATGCACCCGCCATCCAGCCT  
GTCCTTTGGACCACACCACCCCTCCAGCATGGTCAACCGCATGGGTAG**GCTGCCTTCTGCGGGGCTTGCCCTTCT**  
**GGCCATGCCCTTCTTCTTCCCTTGACCTGTACCTCTTGGTCTTTGAATAAAGCCTGAGTAGGAAGTAGCATAA**  
**CCCCTTGGGGCCTCTAAACGGGTCTTGAGGGTTTTTTG**

KLF5 isoform 1

**TAATACGACTCACTATAG**GGAAATAAGAGAGAAAAGAAGAGTAAGAAGAAATATAAGAGCCACCATGGCTACAAG  
GGTGTGAGCATGAGCGCCCGCCTGGGACCCGTGCCCCAGCCGCCGCGCCGAGGACGAGCCGGTGTTCGCGCA  
GCTCAAGCCGGTGTGGGGCGCCGGAATCCGGCCCCGCGACGCGCGCTCTTCCCCGGCGAGGAGCTGAAGCACGC  
GCACCACCGCCCGCAGGCGCAGCCCGCGCCCGCGCAGGCCCGCAGCCGGCCAGCCGCCCGCCACCGGCCCGCG  
GCTGCCTCCAGAGGACCTGGTCCAGACAAGATGTGAAATGGAGAAGTATCTGACACCTCAGCTTCCCTCCAGTTCC  
TATAATTCCAGAGCATAAAAAGTATAGACGAGACAGTGCCTCAGTCGTAGACCAGTTCTTCACTGACACTGAAGG  
GTTACCTTACAGTATCAACATGAACGTCTTCCCTCCCTGACATCACTCACCTGAGAAGTGGCCTTACAAATCCCA  
GAGACCGTGCCTAACACACATCAAGACAGAACCTGTTGCCATTTTCAGCCACCAGAGTGAAACGACTGCCCCCTCC
